# Supplementary material
Source: PubMed Central journal article supplement (PMC1283432)

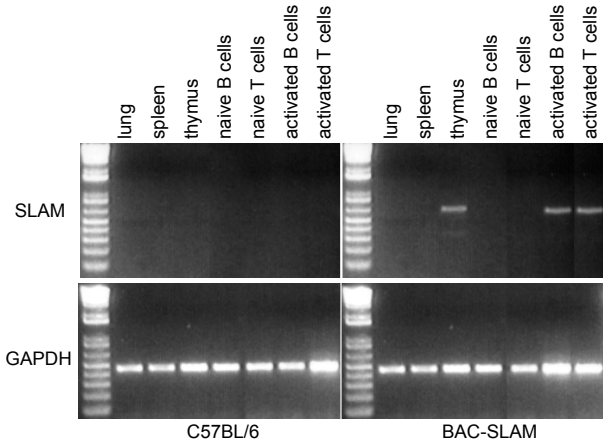

Supplement: pnas_0505945102_1.pdf [file pnas_0505945102_1.pdf]
